# Supplementary material
Source: HighWire-hosted journal article supplement (https://drc.bmj.com/content/8/1/e001122)
Supplement: inline-supplementary-material-2 [file inline-supplementary-material-2.pdf]

## Appendix 2:

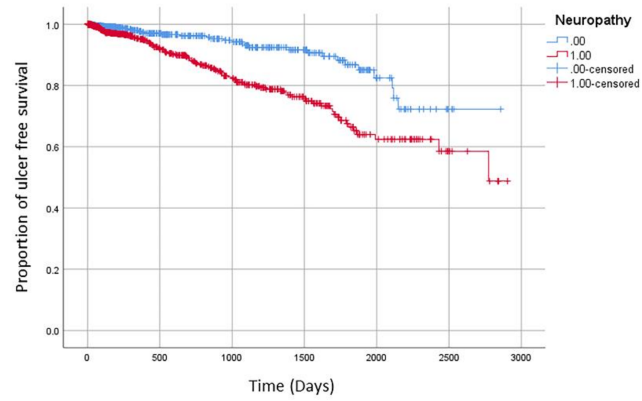

Kaplan-Meier graphs representing the differences in survival times for patients with (code 1) vs those with no (code 0) Neuropathy .
